# Supplementary material
Source: publisher figshare collection journal article supplement (https://asha.figshare.com/ndownloader/files/27385571)
Supplement: Supplementary file 1 [file 27385571]

## Supplemental Material S1.

*Missing data<sup>a</sup>: Descriptive statistics between raw and transformed data.*

|                   | <b>Frequency of children<br/>with missing data</b> | <b>Raw mean<br/><i>M</i> (<i>SD</i>)</b> | <b>Imputed mean<br/><i>M</i> (<i>SD</i>)</b> | <b><i>t</i> score</b> |
|-------------------|----------------------------------------------------|------------------------------------------|----------------------------------------------|-----------------------|
| <b>Session 18</b> |                                                    |                                          |                                              |                       |
| Early PCC         | 1                                                  | .88 (.25)                                | .87 (.25)                                    | $t = .19, p = .86$    |
| Mid PCC           | 16                                                 | .83 (.32)                                | .79 (.29)                                    | $t = .38, p = .71$    |
| Late PCC          | 6                                                  | .78 (.27)                                | .76 (.25)                                    | $t = -.03, p = .98$   |
| Total PCC         | n/a                                                | .84 (.24)                                | .82 (.14)                                    | $t = .49, p = .63$    |
| <b>Session 24</b> |                                                    |                                          |                                              |                       |
| Early PCC         | 1                                                  | .89 (.21)                                | .89 (.21)                                    | $t = -.003, p = .998$ |
| Mid PCC           | 13                                                 | .83 (.24)                                | .83 (.19)                                    | $t = .02, p = .99$    |
| Late PCC          | 3                                                  | .65 (.29)                                | .63 (.30)                                    | $t = .45, p = .65$    |
| Total PCC         | n/a                                                | .80 (.15)                                | .81 (.10)                                    | $t = -.36, p = .72$   |

*Note.* <sup>a</sup>Missing data was identified when the children did not produce spoken target words with phonemes in these categories. These data were considered missing at random. PCC = percentage of consonants correct.
